# Supplementary material for: Ce-Loaded HZSM-5 Composite for Catalytic Deoxygenation of Algal Hydrolyzed Oil into Hydrocarbons and Oxygenated Compounds
Source: MDPI journal article supplement (doi:10.3390/molecules27217251), 2022-10-25
Supplement: s1 [file s1]

## Ce-Loaded HZSM-5 Composite for Catalytic Deoxygenation of Algal Hydrolyzed Oil into Hydrocarbons and Oxygenated Compounds

Mustafa Jawad Nuhma <sup>1,2</sup>, Hajar Alias <sup>1,\*</sup>, Muhammad Tahir <sup>3,\*</sup> and Ali A. Jazie <sup>2</sup>

<sup>1</sup> Department of Chemical Engineering, School of Chemical and Energy Engineering, Universiti Teknologi Malaysia, Johor Bahru 81310, Malaysia.

<sup>2</sup> Chemical Engineering Department, College of Engineering, University of Al-Qadisiyah, Al-Diwaniyah City, P.O. Box 88, Iraq.

<sup>3</sup> Chemical and Petroleum Engineering Department, United Arab Emirates University (UAEU), Al Ain P.O. Box 15551, United Arab Emirates.

\* Correspondence: r-hajar@utm.my (H.A.); muhammad.tahir@uaeu.ac.ae (M.T.); Tel.: +60-19-385 5571 (H.A.); +971-509961678 (M.T.)

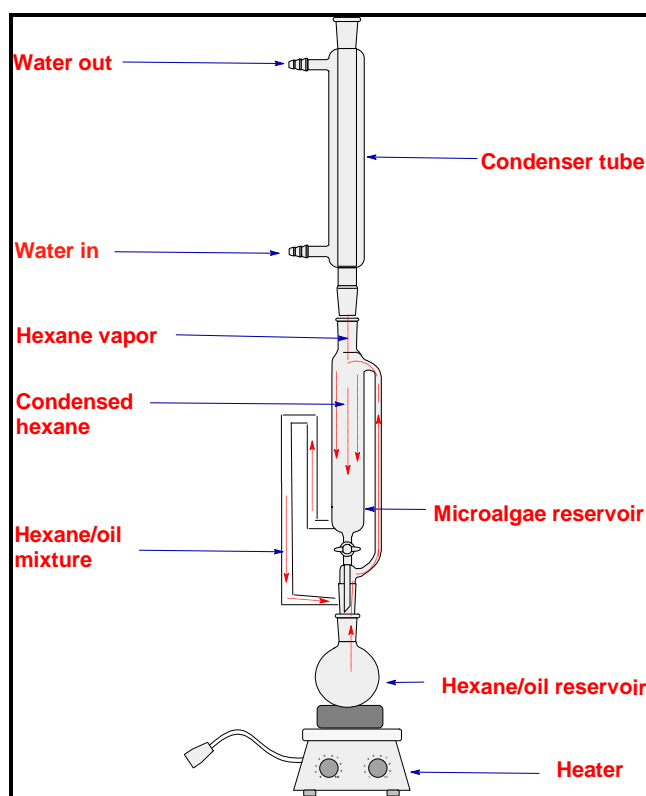

**Figure S1.** Scheme of the soxhlet extractor used to extract the crude oil from *Chlorella Vulgaris* microalgae powder.
